# Supplementary material
Source: PubMed Central journal article supplement (PMC3164537)
Supplement: NIHMS295187-supplement-01.pdf [file NIHMS295187-supplement-01.pdf]

Supplementary Material: Enhanced Inter-helical Contact  
Prediction in Transmembrane Proteins

Y. Wei, C. A. Floudas\*

Department of Chemical and Biological Engineering,  
Princeton University,  
Princeton, NJ 08544-5263, U.S.A.

February 11, 2011

---

\*Author to whom all correspondence should be addressed; Tel: +1-609-258-4595; Fax: +1-609-258-0211.  
*E-mail*: floudas@titan.princeton.edu

# 1 Description of the Constraints for the TRIPLET model

This part of the supplementary material aims at providing a complete description of the constraints for the TRIPLET model. The constraints are grouped into five categories as they were for the PAIRWISE model in this paper.

**Basic model constraints.** There are two basic model constraints for the TRIPLET model. Eq. 1 states that a residue-residue contact can happen only when the two helices containing these two residues are contacting with each other. Eq. 2 expresses that when all the possible residue pairs on helix  $m$  and helix  $n$  are not contacting, the residue contact between helices  $m$  and  $n$  is disallowed.

$$\sum_j \sum_t w_{ijt}^{mn} \leq y_{mn}^P + y_{mn}^A, \quad \forall(i, m, n) \quad (1)$$

$$y_{mn}^P + y_{mn}^A - \sum_j \sum_t w_{ijt}^{mn} \leq 0, \quad \forall(m, n) \quad (2)$$

**Geometrical constraints.** The first geometrical constraint is that a helical pair can only interact either in antiparallel or parallel fashion, and the expression is the same as Eq. 4 for the PAIRWISE model in the paper. This is expressed here in Eq. 3:

$$y_{mn}^P + y_{mn}^A \leq 1, \quad \forall(m, n) \quad (3)$$

The second geometrical constraint deals with the contacting fashion between the first and last helices of a protein, and this idea is the same as in the PAIRWISE model. The constraint is expressed in two equations in the paper, Eq. 4 and Eq. 5. In these two equations,  $N$  is the total number of helices. Eq. 4 disallows the parallel contact between the first and last helices if  $N$  is even, but is not enforced if  $N$  is odd; Eq. 5 disallows the antiparallel contact between the first and last helices if  $N$  is odd, but is not enforced if  $N$  is

even.

$$y_{1N}^P \leq MOD(N, 2), \quad N > 2 \quad (4)$$

$$y_{1N}^A \leq 1 - MOD(N, 2), \quad N > 2 \quad (5)$$

In order to prevent kinks between interacting helices, a similar equation of Eq. 7 is written for TRIPLET model as follows:

$$\begin{aligned} \sum_t (w_{ijt}^{mn} + \sum_l w_{klt}^{mn}) &\leq 1 \quad (6) \\ \forall(i, j, k), (|diff(i, k)| - |diff(j, l)|) &> 3 \\ \text{or } |diff(i, k)| < 5, \text{ or } |diff(j, l)| < 5. \end{aligned}$$

The fourth geometrical constraint is expressed in Eq. 7 and Eq. 8. For a helical pair m and n contacting in parallel, Eq. 7 states if there are two residues pairs (i,j) and (k,l) on them forming contacts, j must be greater than l given i is greater than k. Eq. 8 describes the case when two helices are in antiparallel contact.

$$\begin{aligned} w_{ij}^{mn} + \sum_l w_{kl}^{mn} + y_{mn}^A &\leq 2 \quad (7) \\ \forall(i, j, k) |l > j, (|diff(i, k)| - |diff(j, l)|) &< 3 \end{aligned}$$

$$\begin{aligned} w_{ij}^{mn} + \sum_l w_{kl}^{mn} + y_{mn}^P &\leq 2 \quad (8) \\ \forall(i, j, k) |l < j, (|diff(i, k)| - |diff(j, l)|) &< 3 \end{aligned}$$

The TRIPLET model also includes that constraints dealing with the case when a small

helix and a long helix is connected by a short loop. These constraints are expressed in a similar fashion as those for PAIRWISE model. The equations are as follows in Eqs. 9 and 10:

$$w_{ijt}^{mn} = 0 \quad (9)$$

$$\begin{aligned} \forall(i, j, t) \mid (3.0 \times (\text{loop\_Length}(m, n) - 1) \\ + j \times 6.0/4) \leq (\text{len}(m) - i + 1) \times 6.0/4 \end{aligned}$$

$$w_{ijt}^{mn} = 0 \quad (10)$$

$$\begin{aligned} \forall(i, j, t) \mid (3.0 \times (\text{loop\_Length}(m, n) - 1) \\ + (\text{len}(n) - i + 1) \times 6.0/4 \leq j \times 6.0/4) \end{aligned}$$

**Model complexity constraints.** The first constraint in this category is dealing with the total number of contacts for each helix. A parameter,  $\text{counth}(m)$ , is used to limit the allowed number of helical contacts for helix  $m$ . The functional form of this constraint is same as the one for PAIRWISE model. This is written in Eq. 11.

$$\sum_n (y_{mn}^P + y_{mn}^A) \leq \text{counth}(m), \quad \forall(m) \quad (11)$$

The second constraint of this category, however, is not easily transferable from the one of PAIRWISE model. This constraint basically states that a residue can mostly contact with one other residue. This is the main difference between the TRIPLET and PAIRWISE models. In order to have the similar constraint as in Eq. 11 for the PAIRWISE model, three rules are established. The first rule states that a MAIN residue in a TRIPLET contact can not server either as a MAIN or SECONDARY residue in another TRIPLET contact; the second rule says two SECONDARY residues of a TRIPLET contact cannot participate in TRIPLET contacts with multiple residues; the third rule states that a SECONDARY

residue is disallowed to form more than two contacts. These rules are implemented through several constraints in the following.

The first rule is constrained by the following three equations, Eqs 12, 13 and 14.

$$w_{i,j,t=2}^{mn} + \sum_k (w_{j,k,t=2}^{np} + w_{j+1,k,t=2}^{np}) \leq 1, \quad \forall(i, j) \quad (12)$$

This equation restricts that if residue  $j$  or  $j+1$  serves as a MAIN residue on helix  $n$  in a TRIPLET contact between helix  $n$  and helix  $p$ ,  $j$  or  $j+1$  cannot serve as a SECONDARY residue in another TRIPLET contacts.

$$w_{i,j,t=1}^{mn} + \sum_k w_{j,k,t=2}^{np} \leq 1, \quad \forall(i, j) \quad (13)$$

Eq. 13 basically states that if  $j$  serves as a MAIN residue of a TRIPLET contact, it cannot serves as another MAIN residue in a second TRIPLET contact. That is  $w_{i,j,t=1}^{mn} = 0$  if  $\sum_k w_{j,k,t=2}^{np} = 1$ ; and  $\sum_k w_{j,k,t=2}^{np} = 0$  if  $w_{i,j,t=1}^{mn} = 1$ .

Equation 14 has the similar effect as Eq. 12. It states that if residue  $j$  or  $j-1$  serves as a MAIN residue on helix  $n$  in a TRIPLET contact between helix  $n$  and helix  $m$ ,  $j$  or  $j-1$  cannot serve as a SECONDARY residue in another TRIPLET contacts.

$$w_{i,j,t=1}^{mn} + \sum_k (w_{j,k,t=1}^{np} + w_{j-1,k,t=1}^{np}) \leq 1, \quad \forall(i, j) \quad (14)$$

Eq. 15 is used to impose the second rule. It states that if residue  $j$  and its neighbor residue serve as SECONDARY residues in a TRIPLET contact, then they cannot participate in other TRIPLET contact as a SECONDARY residue pair.

$$w_{i,j,t=2}^{mn} + \sum_k w_{j,k,t=1}^{np} \leq 1, \quad \forall(i, j) \quad (15)$$

The final rule is implemented in Eq. 16. This limits the overlapping TRIPLETs on one helix. This equation says if residue  $j$  is a SECONDARY residue on helix  $n$  of a TRIPLET between helix  $m$  and  $n$ , only one of its neighbor residue,  $j+1$  or  $j-1$ , can participate in a TRIPLET contact.

$$w_{i,j,t=2}^{mn} + \sum_k (w_{j-1,k,t=1}^{np} + w_{j+1,k,t=1}^{np}) \leq 1, \quad \forall(i, j) \quad (16)$$

**Membrane protein observations.** The first constraint in this category limits the neighboring helices to form anti-parallel contacts, which is written as:

$$\sum_{mn; (n-m)=1} y_{mn}^P \leq 0 \quad (17)$$

The second constraint prevents the helical contact prediction resulting in the overlap between two helices less than 90% of the shorter helix, and this is expressed in the following equations, Eq. 19 and Eq. 20.

$$w_{ij}^{mn} + y_{mn}^A \leq 1, \quad \forall(i, j, m, n) \quad (18)$$

*if overlap between helices  $(m, n)$  is  $< 90\%$  of the shorter helix*

$$w_{ij}^{mn} + y_{mn}^P \leq 1, \quad \forall(i, j, m, n) \quad (19)$$

*if overlap between helices  $(m, n)$  is  $< 90\%$  of the shorter helix*

**Model features.** Max\_contact and subtract parameters in TRIPLET model have the same effect as in PAIRWISE model. Max\_contact is used to limit the maximum number of residue-residue contacts for each contacting helical pair. For TRIPLET model, this is expressed in Eq. 20.

$$\sum_i \sum_j \sum_t w_{ijt}^{mn} \leq \text{max\_contact} \times (y_{mn}^P + y_{mn}^A), \quad \forall(m, n) \quad (20)$$

In a similar fashion, subtract value is used here to reduce the number of helical contact predictions, thus allowing various different degrees of helix packing. The functional form of this constraint is as follows:

$$\sum_{mn; m < n} (y_{mn}^P + y_{mn}^A) \leq \sum_m \text{counth}(m)/2 - \text{subtract} \quad (21)$$

Finally, in order to generate a rank-order list, the same strategy of using integer cut is used to generate multiple solutions, see Eq. 49 of McAllister and Floudas (2008) [1]. The functional form is expressed as in Eq. 22:

$$\sum_{(m,n) \in A} (y_{mn}^P + y_{mn}^A) + \sum_{(i,j,t) \in A} w_{ijt}^{mn} - \sum_{(m,n) \in I} (y_{mn}^P + y_{mn}^A) - \sum_{(i,j,t) \in I} w_{ijt}^{mn} \leq \text{card}(A) - 1 \quad (22)$$

For additional information about the model, the readers are referred to the paper by McAllister and Floudas [1].

## 2 Probability Sets

This section contains the tables for the developed probability sets. Since AL-T and AL-P probability sets are directly obtained from the work by McAllister and Floudas [1], they are not included in this section. The tables start from the next page.

|   | A        | F        | G        | I        | L        | M        | P        | V        | W        |
|---|----------|----------|----------|----------|----------|----------|----------|----------|----------|
| A | 0.008902 | 0.004946 | 0.014837 | 0.013848 | 0.014837 | 0.003956 | 0.005935 | 0.012859 | 0.005935 |
| F | 0.004946 | 0.001978 | 0.006924 | 0.004946 | 0.008902 | 0.002967 | 0.001978 | 0.004946 | 0.001978 |
| G | 0.014837 | 0.006924 | 0.005935 | 0.006924 | 0.014837 | 0.003956 | 0.006924 | 0.016815 | 0.001978 |
| I | 0.013848 | 0.004946 | 0.006924 | 0.000989 | 0.011869 | 0.002967 | 0.001978 | 0.008902 | 0.001978 |
| L | 0.014837 | 0.008902 | 0.014837 | 0.011869 | 0.004946 | 0.004946 | 0.003956 | 0.009891 | 0.000989 |
| M | 0.003956 | 0.002967 | 0.003956 | 0.002967 | 0.004946 | 0.000989 | 0.000989 | 0.005935 | 0.000989 |
| P | 0.005935 | 0.001978 | 0.006924 | 0.001978 | 0.003956 | 0.000989 | 0.000000 | 0.005935 | 0.000000 |
| V | 0.012859 | 0.004946 | 0.016815 | 0.008902 | 0.009891 | 0.005935 | 0.005935 | 0.005935 | 0.000989 |
| W | 0.005935 | 0.001978 | 0.001978 | 0.001978 | 0.000989 | 0.000989 | 0.000000 | 0.000989 | 0.000000 |
| C | 0.003956 | 0.000000 | 0.000000 | 0.001978 | 0.000000 | 0.000989 | 0.000000 | 0.000989 | 0.000000 |
| N | 0.005935 | 0.001978 | 0.001978 | 0.004946 | 0.000989 | 0.000000 | 0.003956 | 0.000000 | 0.000000 |
| Q | 0.001978 | 0.001978 | 0.000989 | 0.000000 | 0.001978 | 0.000000 | 0.000000 | 0.000989 | 0.000000 |
| S | 0.008902 | 0.001978 | 0.006924 | 0.008902 | 0.002967 | 0.000000 | 0.001978 | 0.003956 | 0.001978 |
| T | 0.004946 | 0.003956 | 0.004946 | 0.003956 | 0.002967 | 0.000000 | 0.003956 | 0.000989 | 0.000000 |
| Y | 0.001978 | 0.002967 | 0.000989 | 0.000000 | 0.003956 | 0.001978 | 0.000000 | 0.004946 | 0.000000 |

Table 1: Parallel PRIMARY MIN-1N PAIRWISE probabilities.



|   | A        | F        | G        | I        | L        | M        | P        | V        | W        |
|---|----------|----------|----------|----------|----------|----------|----------|----------|----------|
| A | 0.022750 | 0.017804 | 0.013848 | 0.022750 | 0.022750 | 0.007913 | 0.008902 | 0.023739 | 0.002967 |
| F | 0.017804 | 0.004946 | 0.015826 | 0.006924 | 0.008902 | 0.006924 | 0.002967 | 0.008902 | 0.003956 |
| G | 0.013848 | 0.015826 | 0.019782 | 0.015826 | 0.015826 | 0.001978 | 0.008902 | 0.010880 | 0.004946 |
| I | 0.022750 | 0.006924 | 0.015826 | 0.006924 | 0.008902 | 0.006924 | 0.005935 | 0.012859 | 0.003956 |
| L | 0.022750 | 0.008902 | 0.015826 | 0.008902 | 0.017804 | 0.004946 | 0.004946 | 0.017804 | 0.000989 |
| M | 0.007913 | 0.006924 | 0.001978 | 0.006924 | 0.004946 | 0.001978 | 0.002967 | 0.002967 | 0.001978 |
| P | 0.008902 | 0.002967 | 0.008902 | 0.005935 | 0.004946 | 0.002967 | 0.000000 | 0.004946 | 0.002967 |
| V | 0.023739 | 0.008902 | 0.010880 | 0.012859 | 0.017804 | 0.002967 | 0.004946 | 0.008902 | 0.000989 |
| W | 0.002967 | 0.003956 | 0.004946 | 0.003956 | 0.000989 | 0.001978 | 0.002967 | 0.000989 | 0.000000 |
| C | 0.003956 | 0.002967 | 0.000000 | 0.001978 | 0.003956 | 0.000989 | 0.000000 | 0.001978 | 0.000000 |
| N | 0.008902 | 0.000000 | 0.002967 | 0.001978 | 0.000989 | 0.000989 | 0.000000 | 0.004946 | 0.002967 |
| Q | 0.001978 | 0.001978 | 0.000989 | 0.000989 | 0.000989 | 0.000000 | 0.000000 | 0.000989 | 0.000000 |
| S | 0.015826 | 0.010880 | 0.013848 | 0.008902 | 0.005935 | 0.004946 | 0.002967 | 0.005935 | 0.000000 |
| T | 0.017804 | 0.010880 | 0.006924 | 0.009891 | 0.009891 | 0.001978 | 0.004946 | 0.011869 | 0.001978 |
| Y | 0.009891 | 0.004946 | 0.003956 | 0.001978 | 0.003956 | 0.002967 | 0.003956 | 0.004946 | 0.000989 |

Table 2: Antiparallel PRIMARY MIN-1N PAIRWISE probabilities.

|   | A        | F        | G        | I        | L        | M        | P        | V        | W        |
|---|----------|----------|----------|----------|----------|----------|----------|----------|----------|
| A | 0.597222 | 0.393750 | 0.736667 | 0.701389 | 0.631410 | 0.666667 | 0.530000 | 0.597222 | 0.002967 |
| F | 0.393750 | 0.200000 | 0.687500 | 0.666667 | 0.484694 | 0.555556 | 1.000000 | 0.468750 | 0.003956 |
| G | 0.736667 | 0.687500 | 0.630952 | 0.726191 | 0.634325 | 0.333333 | 0.752381 | 0.612180 | 0.004946 |
| I | 0.701389 | 0.666667 | 0.726191 | 0.000000 | 0.540476 | 0.750000 | 0.000000 | 0.654762 | 0.003956 |
| L | 0.631410 | 0.484694 | 0.634325 | 0.540476 | 0.733333 | 0.478571 | 0.625000 | 0.663889 | 0.000989 |
| M | 0.666667 | 0.555556 | 0.333333 | 0.750000 | 0.478571 | 0.600000 | 1.000000 | 0.355238 | 0.001978 |
| P | 0.530000 | 1.000000 | 0.752381 | 0.000000 | 0.625000 | 1.000000 | 0.000000 | 0.353333 | 0.002967 |
| V | 0.597222 | 0.468750 | 0.612180 | 0.654762 | 0.663889 | 0.355238 | 0.353333 | 0.700794 | 0.000989 |
| W | 0.562500 | 0.500000 | 0.500000 | 0.000000 | 0.400000 | 0.250000 | 0.000000 | 0.500000 | 0.000000 |
| C | 0.722222 | 0.000000 | 0.000000 | 0.483333 | 0.000000 | 0.500000 | 0.000000 | 0.714286 | 0.000000 |
| N | 0.406250 | 1.000000 | 0.500000 | 0.610714 | 1.000000 | 0.000000 | 0.312500 | 0.000000 | 0.002967 |
| Q | 0.333333 | 0.750000 | 0.250000 | 0.000000 | 0.250000 | 0.000000 | 0.000000 | 0.500000 | 0.000000 |
| S | 0.708333 | 0.625000 | 0.458333 | 0.708333 | 0.833333 | 0.000000 | 0.000000 | 0.569444 | 0.000000 |
| T | 0.350000 | 0.226191 | 0.666667 | 0.488095 | 0.738095 | 0.000000 | 0.777778 | 0.000000 | 0.001978 |
| Y | 0.875000 | 0.550000 | 0.500000 | 0.000000 | 0.250000 | 0.583333 | 0.000000 | 0.390000 | 0.000989 |

Table 3: Parallel WHEEL MIN-1N PAIRWISE probabilities.

|   | A        | F        | G        | I        | L        | M        | P        | V        | W        |
|---|----------|----------|----------|----------|----------|----------|----------|----------|----------|
| A | 0.517045 | 0.422619 | 0.417208 | 0.518128 | 0.488095 | 0.698980 | 0.578125 | 0.472457 | 0.002967 |
| F | 0.422619 | 0.833333 | 0.507143 | 0.423611 | 0.711309 | 0.388889 | 0.583333 | 0.535714 | 0.003956 |
| G | 0.417208 | 0.507143 | 0.590278 | 0.555736 | 0.362179 | 0.125000 | 0.711640 | 0.527056 | 0.004946 |
| I | 0.518128 | 0.423611 | 0.555736 | 0.278571 | 0.750000 | 0.260417 | 0.465278 | 0.542582 | 0.003956 |
| L | 0.488095 | 0.711309 | 0.362179 | 0.750000 | 0.583333 | 0.333333 | 0.416667 | 0.460417 | 0.000989 |
| M | 0.698980 | 0.388889 | 0.125000 | 0.260417 | 0.333333 | 0.250000 | 0.527778 | 0.575000 | 0.001978 |
| P | 0.578125 | 0.583333 | 0.711640 | 0.465278 | 0.416667 | 0.527778 | 0.000000 | 0.562500 | 0.002967 |
| V | 0.472457 | 0.535714 | 0.527056 | 0.542582 | 0.460417 | 0.575000 | 0.562500 | 0.498639 | 0.000989 |
| W | 1.000000 | 0.598214 | 0.654762 | 0.708333 | 0.000000 | 0.250000 | 0.222222 | 1.000000 | 0.000000 |
| C | 0.450000 | 0.611111 | 0.000000 | 0.500000 | 0.700000 | 0.500000 | 0.000000 | 0.500000 | 0.000000 |
| N | 0.466667 | 0.000000 | 0.666667 | 0.000000 | 1.000000 | 0.500000 | 0.000000 | 0.250000 | 0.002967 |
| Q | 0.625000 | 0.187500 | 0.500000 | 0.333333 | 0.500000 | 0.000000 | 0.000000 | 0.500000 | 0.000000 |
| S | 0.461667 | 0.537037 | 0.718750 | 0.833333 | 0.339286 | 0.468750 | 0.833333 | 0.518056 | 0.000000 |
| T | 0.599868 | 0.528125 | 0.580556 | 0.566667 | 0.512649 | 0.812500 | 0.375000 | 0.434848 | 0.001978 |
| Y | 0.611111 | 0.413333 | 0.333333 | 1.000000 | 0.166667 | 0.250000 | 0.430556 | 0.241667 | 0.000989 |

Table 4: Antiparallel WHEEL MIN-1N PAIRWISE probabilities.

| TRIP | Prob     | TRIP | Prob     | TRIP | Prob     | TRIP | Prob     |
|------|----------|------|----------|------|----------|------|----------|
| AAL  | 0.001445 | ADQ  | 0.001445 | MME  | 0.002168 | CLR  | 0.001445 |
| AAM  | 0.002168 | AEC  | 0.001445 | MMH  | 0.004335 | CMC  | 0.001445 |
| AAV  | 0.001445 | AHA  | 0.001445 | MMR  | 0.001445 | CMS  | 0.001445 |
| AAC  | 0.004335 | AHL  | 0.002168 | MVH  | 0.001445 | CMY  | 0.001445 |
| AAN  | 0.001445 | AHM  | 0.002168 | MCM  | 0.001445 | CME  | 0.002168 |
| AAQ  | 0.001445 | AHV  | 0.00289  | MCC  | 0.00578  | CMK  | 0.001445 |
| AAS  | 0.001445 | AHC  | 0.002168 | MCN  | 0.002168 | CVC  | 0.002168 |
| AAY  | 0.001445 | AHS  | 0.001445 | MCS  | 0.001445 | CVQ  | 0.001445 |
| AAD  | 0.002168 | AHT  | 0.001445 | MNC  | 0.001445 | CVY  | 0.001445 |
| AAH  | 0.004335 | AHH  | 0.00289  | MNE  | 0.001445 | CVH  | 0.002168 |
| ALA  | 0.001445 | GVC  | 0.002168 | MQY  | 0.001445 | CVK  | 0.002168 |
| ALC  | 0.001445 | IGS  | 0.001445 | MSC  | 0.002168 | CCC  | 0.001445 |
| ALN  | 0.001445 | IMH  | 0.001445 | MSQ  | 0.001445 | CSH  | 0.001445 |
| AMA  | 0.002168 | IVP  | 0.001445 | MDD  | 0.001445 | CYH  | 0.001445 |
| AML  | 0.001445 | IVC  | 0.002168 | MHV  | 0.001445 | CDH  | 0.002168 |
| AMV  | 0.00289  | ICV  | 0.002168 | MHC  | 0.002168 | CHE  | 0.001445 |
| AMC  | 0.001445 | ICC  | 0.001445 | MKC  | 0.001445 | CHH  | 0.001445 |
| AMN  | 0.001445 | IEC  | 0.002168 | PAC  | 0.001445 | CHK  | 0.002168 |
| AME  | 0.001445 | IHS  | 0.001445 | VAC  | 0.001445 | NMY  | 0.001445 |
| AMH  | 0.001445 | LAM  | 0.00289  | VAE  | 0.001445 | NHH  | 0.001445 |

Table 5: Parallel MIN-2N TRIPLET probabilities (1 of 2).

| TRIP | Prob     | TRIP | Prob     | TRIP | Prob     | TRIP | Prob     |
|------|----------|------|----------|------|----------|------|----------|
| AVL  | 0.001445 | LAV  | 0.001445 | VMN  | 0.001445 | QVH  | 0.001445 |
| AVV  | 0.001445 | LAC  | 0.002168 | VVC  | 0.001445 | SAE  | 0.001445 |
| AVC  | 0.001445 | LLC  | 0.002168 | VVH  | 0.001445 | SVH  | 0.001445 |
| AVN  | 0.002168 | LML  | 0.002168 | VCC  | 0.001445 | SHR  | 0.001445 |
| AVH  | 0.003613 | LMC  | 0.001445 | VCN  | 0.001445 | THR  | 0.002168 |
| AVK  | 0.001445 | LMN  | 0.002168 | VCH  | 0.001445 | YCK  | 0.001445 |
| ACA  | 0.001445 | LMS  | 0.002168 | VSN  | 0.001445 | YNE  | 0.001445 |
| ACM  | 0.00289  | LME  | 0.003613 | VDV  | 0.001445 | DWE  | 0.001445 |
| ACC  | 0.004335 | LMK  | 0.002168 | VHC  | 0.00289  | DCR  | 0.001445 |
| ACS  | 0.002168 | LVD  | 0.001445 | VHR  | 0.001445 | EAH  | 0.001445 |
| ACH  | 0.00289  | LVH  | 0.002168 | WLT  | 0.001445 | EMH  | 0.001445 |
| ACR  | 0.002168 | LSM  | 0.001445 | WVC  | 0.001445 | EWE  | 0.001445 |
| ANV  | 0.001445 | LHC  | 0.001445 | WCN  | 0.001445 | ESE  | 0.002168 |
| ANC  | 0.001445 | MAC  | 0.003613 | CAC  | 0.003613 | EDH  | 0.001445 |
| AQG  | 0.001445 | MAN  | 0.001445 | CAE  | 0.001445 | EHH  | 0.001445 |
| AQV  | 0.001445 | MFH  | 0.001445 | CAH  | 0.005058 | HAH  | 0.001445 |
| ASS  | 0.001445 | MLD  | 0.001445 | CFD  | 0.001445 | HHR  | 0.001445 |
| ASH  | 0.001445 | MMV  | 0.00289  | CFR  | 0.001445 |      |          |
| ADG  | 0.001445 | MMC  | 0.002168 | CLQ  | 0.001445 |      |          |
| ADL  | 0.001445 | MMN  | 0.001445 | CLK  | 0.001445 |      |          |

Table 6: Parallel MIN-2N TRIPLET probabilities (2 of 2).

| TRIP | Prob     | TRIP | Prob     | TRIP | Prob     | TRIP | Prob     |
|------|----------|------|----------|------|----------|------|----------|
| AAG  | 0.002168 | GAL  | 0.001445 | MVH  | 0.001445 | CME  | 0.001445 |
| AAI  | 0.002168 | GAC  | 0.001445 | MVK  | 0.001445 | CMH  | 0.00578  |
| AAL  | 0.00578  | GQN  | 0.001445 | MWQ  | 0.001445 | CMK  | 0.001445 |
| AAM  | 0.002168 | GQE  | 0.001445 | MCM  | 0.001445 | CPH  | 0.001445 |
| AAV  | 0.006503 | IAE  | 0.001445 | MCV  | 0.00289  | CVD  | 0.00289  |
| AAW  | 0.001445 | IMM  | 0.001445 | MCC  | 0.007225 | CVK  | 0.001445 |
| AAC  | 0.005058 | IMS  | 0.001445 | MCH  | 0.001445 | CVR  | 0.001445 |
| AAN  | 0.004335 | IVV  | 0.001445 | MCK  | 0.001445 | CCC  | 0.00578  |
| AAD  | 0.002168 | ICH  | 0.001445 | MQE  | 0.004335 | CCQ  | 0.001445 |
| AAE  | 0.002168 | IQL  | 0.001445 | MSC  | 0.002168 | CCS  | 0.001445 |
| AAH  | 0.006503 | ISC  | 0.002168 | MSE  | 0.002168 | CCT  | 0.001445 |
| AAK  | 0.001445 | IDC  | 0.001445 | MSH  | 0.001445 | CCY  | 0.003613 |
| AAR  | 0.003613 | LAL  | 0.001445 | MTE  | 0.001445 | CCD  | 0.004335 |
| AFF  | 0.001445 | LAM  | 0.002168 | MYE  | 0.001445 | CCE  | 0.003613 |
| AGM  | 0.002168 | LAV  | 0.001445 | MDM  | 0.001445 | CCH  | 0.00578  |
| AGV  | 0.001445 | LAC  | 0.003613 | MDC  | 0.001445 | CCK  | 0.001445 |
| AGR  | 0.001445 | LAQ  | 0.00289  | MDD  | 0.001445 | CCR  | 0.001445 |
| AIG  | 0.001445 | LAS  | 0.001445 | MDE  | 0.002168 | CNS  | 0.001445 |
| AII  | 0.001445 | LAT  | 0.002168 | MHV  | 0.001445 | CQT  | 0.001445 |
| ALA  | 0.004335 | LAY  | 0.002168 | MHC  | 0.004335 | CQD  | 0.002168 |
| ALL  | 0.001445 | LAH  | 0.001445 | MHN  | 0.002168 | CQE  | 0.001445 |
| ALC  | 0.002168 | LFC  | 0.001445 | MHH  | 0.001445 | CSH  | 0.001445 |
| ALY  | 0.001445 | LFE  | 0.001445 | MRD  | 0.00289  | CTS  | 0.001445 |
| ALH  | 0.002168 | LID  | 0.001445 | PAK  | 0.001445 | CYH  | 0.001445 |
| AMI  | 0.002168 | LLL  | 0.001445 | PMV  | 0.001445 | CDN  | 0.002168 |
| AMM  | 0.007225 | LLM  | 0.002168 | PDS  | 0.001445 | CDQ  | 0.002168 |
| AMV  | 0.007948 | LLC  | 0.00289  | PHH  | 0.001445 | CDD  | 0.00289  |

Table 7: Antiparallel MIN-2N TRIPLET probabilities (1 of 3).

| TRIP | Prob     | TRIP | Prob     | TRIP | Prob     | TRIP | Prob     |
|------|----------|------|----------|------|----------|------|----------|
| AMC  | 0.004335 | LMV  | 0.001445 | VAC  | 0.002168 | CDH  | 0.001445 |
| AMN  | 0.001445 | LMC  | 0.004335 | VAS  | 0.00289  | CEC  | 0.001445 |
| AMD  | 0.001445 | LMD  | 0.001445 | VAE  | 0.003613 | CEH  | 0.001445 |
| AME  | 0.002168 | LVM  | 0.001445 | VAH  | 0.001445 | CEK  | 0.001445 |
| AMH  | 0.003613 | LVV  | 0.00289  | VIC  | 0.001445 | CER  | 0.001445 |
| AMK  | 0.001445 | LVC  | 0.001445 | VLC  | 0.002168 | CHC  | 0.001445 |
| AVM  | 0.003613 | LVD  | 0.002168 | VLE  | 0.001445 | CHQ  | 0.00289  |
| AVV  | 0.004335 | LVH  | 0.001445 | VLH  | 0.002168 | CHS  | 0.002168 |
| AVC  | 0.005058 | LCV  | 0.003613 | VMC  | 0.003613 | CHD  | 0.002168 |
| AVN  | 0.001445 | LCC  | 0.001445 | VMS  | 0.001445 | CHE  | 0.001445 |
| AVE  | 0.001445 | LCS  | 0.002168 | VMD  | 0.002168 | CHH  | 0.007225 |
| AVH  | 0.001445 | LCY  | 0.002168 | VMH  | 0.001445 | CHR  | 0.001445 |
| AWT  | 0.001445 | LNH  | 0.001445 | VMK  | 0.001445 | NAH  | 0.00289  |
| ACA  | 0.002168 | LQE  | 0.002168 | VVV  | 0.001445 | NAR  | 0.001445 |
| ACF  | 0.00289  | LQK  | 0.002168 | VVC  | 0.004335 | NME  | 0.00289  |
| ACI  | 0.001445 | LSK  | 0.001445 | VVN  | 0.00289  | NVE  | 0.001445 |
| ACL  | 0.002168 | LYC  | 0.001445 | VVD  | 0.001445 | NCE  | 0.001445 |
| ACM  | 0.003613 | LDY  | 0.001445 | VVH  | 0.002168 | NHE  | 0.001445 |
| ACP  | 0.001445 | LDD  | 0.001445 | VWS  | 0.002168 | NRY  | 0.001445 |
| ACV  | 0.003613 | LDE  | 0.001445 | VCS  | 0.001445 | QAS  | 0.001445 |
| ACC  | 0.004335 | LEM  | 0.002168 | VCH  | 0.001445 | QQS  | 0.00289  |
| ACE  | 0.002168 | LEP  | 0.001445 | VCR  | 0.001445 | QDH  | 0.00289  |
| ACH  | 0.003613 | LEV  | 0.00289  | VNC  | 0.001445 | QHH  | 0.001445 |
| AQC  | 0.001445 | LEC  | 0.00289  | VSD  | 0.002168 | SAE  | 0.001445 |
| AQS  | 0.002168 | LEH  | 0.001445 | VYS  | 0.001445 | SAH  | 0.001445 |
| ASV  | 0.001445 | LHM  | 0.001445 | VYD  | 0.002168 | SME  | 0.002168 |
| ASC  | 0.002168 | LHV  | 0.004335 | VDN  | 0.002168 | SVD  | 0.001445 |

Table 8: Antiparallel MIN-2N TRIPLET probabilities (2 of 3).

| TRIP | Prob     | TRIP | Prob     | TRIP | Prob     | TRIP | Prob     |
|------|----------|------|----------|------|----------|------|----------|
| ASR  | 0.002168 | LHC  | 0.001445 | VED  | 0.00289  | SCH  | 0.001445 |
| AYH  | 0.002168 | LHQ  | 0.001445 | VEE  | 0.001445 | SHH  | 0.001445 |
| ADL  | 0.00289  | LHE  | 0.001445 | VHC  | 0.003613 | SHR  | 0.001445 |
| ADV  | 0.001445 | LRM  | 0.001445 | VHN  | 0.001445 | TAH  | 0.002168 |
| ADC  | 0.001445 | MAC  | 0.00289  | VHD  | 0.00289  | TCH  | 0.001445 |
| ADN  | 0.002168 | MAD  | 0.003613 | VHE  | 0.001445 | TCR  | 0.001445 |
| ADQ  | 0.002168 | MAE  | 0.005058 | VHH  | 0.001445 | TRY  | 0.001445 |
| ADY  | 0.001445 | MAH  | 0.00289  | WMC  | 0.001445 | YCH  | 0.001445 |
| ADE  | 0.002168 | MFV  | 0.001445 | WVD  | 0.001445 | DAD  | 0.002168 |
| ADH  | 0.001445 | MGC  | 0.001445 | WCC  | 0.002168 | DAH  | 0.002168 |
| AEV  | 0.001445 | MIV  | 0.001445 | CAN  | 0.002168 | DLK  | 0.001445 |
| AEC  | 0.002168 | MLM  | 0.001445 | CAS  | 0.001445 | DLR  | 0.001445 |
| AES  | 0.002168 | MLV  | 0.001445 | CAT  | 0.003613 | DNH  | 0.001445 |
| AHA  | 0.004335 | MLC  | 0.001445 | CAY  | 0.001445 | DDE  | 0.001445 |
| AHL  | 0.002168 | MLN  | 0.002168 | CAD  | 0.002168 | EAH  | 0.002168 |
| AHV  | 0.003613 | MLE  | 0.001445 | CAE  | 0.002168 | EAR  | 0.001445 |
| AHC  | 0.003613 | MLH  | 0.002168 | CAH  | 0.00578  | ELH  | 0.001445 |
| AHT  | 0.001445 | MMV  | 0.00289  | CAK  | 0.004335 | EVH  | 0.001445 |
| AHD  | 0.003613 | MMC  | 0.00578  | CAR  | 0.001445 | ECH  | 0.001445 |
| AHE  | 0.002168 | MMD  | 0.00289  | CLD  | 0.00289  | EHH  | 0.002168 |
| AHH  | 0.00289  | MME  | 0.001445 | CLE  | 0.002168 | ERH  | 0.001445 |
| AHK  | 0.001445 | MMH  | 0.002168 | CLH  | 0.002168 | HMH  | 0.001445 |
| AKT  | 0.001445 | MPC  | 0.00289  | CLR  | 0.001445 | HSR  | 0.001445 |
| ARL  | 0.001445 | MPD  | 0.002168 | CMS  | 0.001445 | HDH  | 0.002168 |
| ARC  | 0.001445 | MPE  | 0.003613 | CMT  | 0.00289  | RLR  | 0.001445 |
| FAC  | 0.001445 | MVC  | 0.002168 | CMY  | 0.001445 |      |          |
| FCC  | 0.001445 | MVD  | 0.001445 | CMD  | 0.002168 |      |          |

Table 9: Antiparallel MIN-2N TRIPLET probabilities (3 of 3).



|                  |           |           |           |
|------------------|-----------|-----------|-----------|
| PDB ID           | 2ZY9A     | 2W1PA     | 3CN5A     |
| No. of Helices   | 5         | 6         | 6         |
| Helical Segments | 265R-284F | 42F-53F   | 15I-26A   |
|                  | 290A-314T | 82F-94Y   | 49A-60C   |
|                  | 336K-360G | 124A-136G | 96C-107K  |
|                  | 364L-388F | 165E-176V | 137E-148V |
|                  | 398A-422R | 194I-203L | 167A-178V |
|                  |           | 238G-248S | 217G-226A |
| PDB ID           | 3KCUA     | 3IXZA     | 3K3FA     |
| No. of Helices   | 6         | 10        | 10        |
| Helical Segments | 8Y-31T    | 66A-79W   | 25G-45Y   |
|                  | 40K-64S   | 108L-119C | 48T-67L   |
|                  | 85N-109E  | 271D-282A | 78G-97Y   |
|                  | 125A-148C | 305C-317A | 100A-120L |
|                  | 163K-187F | 754L-766I | 127G-150S |
|                  | 220M-244L | 780T-789D | 187M-206S |
|                  |           | 830Q-842D | 210A-229S |
|                  |           | 893Y-902M | 233P-256Y |
|                  |           | 932A-943L | 259I-279F |
|                  |           | 966P-977D | 282L-306G |

Table 10: Transmembrane helical segments predicted by MEMSAT3 method for the independent test set (See David T. Jones, "Improving the accuracy of transmembrane protein topology prediction using evolutionary information", *Bioinformatics*, 2007;23(5):538-544).

|                  |           |           |           |
|------------------|-----------|-----------|-----------|
| PDB ID           | 2ZY9A     | 2W1PA     | 3CN5A     |
| No. of Helices   | 5         | 6         | 6         |
| Helical Segments | 260W-283G | 38M-56A   | 10A-27T   |
|                  | 295A-313A | 77M-94Y   | 45G-62A   |
|                  | 334L-359D | 121I-141M | 88A-106V  |
|                  | 366L-387L | 160R-179L | 132T-151A |
|                  | 400V-421A | 190A-206I | 167A-183I |
|                  |           | 223W-250W | 212W-229H |
| PDB ID           | 3KCUA     | 3IXZA     | 3K3FA     |
| No. of Helices   | 7         | 10        | 10        |
| Helical Segments | 8Y-31T    | 74L-88A   | 35T-48T   |
|                  | 35P-55V   | 103N-117T | 50L-62T   |
|                  | 87L-113A  | 272L-286C | 82F-94F   |
|                  | 118G-151V | 294A-309G | 100A-116M |
|                  | 165F-176A | 752Y-769T | 132T-146V |
|                  | 182S-198F | 776L-792P | 193V-203L |
|                  | 217L-241L | 827S-841T | 210A-227M |
|                  |           | 896F-909L | 237G-249A |
|                  |           | 930V-944C | 264Y-283L |
|                  |           | 963W-977D | 289P-302F |

Table 11: Transmembrane helical segments obtained from PDBTM(See Tusnady GE, Dosztanyi Z, Simon I. Transmembrane proteins in the Protein Data Bank: identification and classification. *Bioinformatics*. 2004;20(17):2964-72).

| Res1 | Res2 | Distance | Res1 | Res3 | Distance |
|------|------|----------|------|------|----------|
| 276V | 300V | 19.00    | 276V | 301L | 17.40    |
| 275M | 348L | 27.10    | 275M | 349S | 27.10    |
| 272L | 301L | 21.30    | 272L | 302L | 17.60    |
| 360G | 290A | 17.10    | 360G | 291V | 13.50    |
| 298V | 352L | 12.00    | 298V | 353V | 13.60    |
| 348L | 301L | 10.10    | 348L | 302L | 12.80    |
| 338M | 384F | 9.20     | 338M | 385E | 11.10    |
| 370V | 352L | 10.70    | 370V | 353V | 9.40     |
| 372L | 351L | 10.40    | 372L | 352L | 8.60     |
| 382V | 405V | 7.90     | 382V | 406A | 10.50    |
| 368V | 420V | 9.10     | 368V | 421A | 8.40     |
| 367V | 420V | 7.00     | 367V | 421A | 6.10     |
| 275M | 408L | 10.80    | 275M | 409S | 9.90     |

Table 12: The proposed contact prediction for 2ZY9A from our method. Res1 is the MAIN residue and Res2 and Res3 are the SECONDARY residues in the TRIPLET contact.

| Res1 | Res2 | Distance | Res1 | Res3 | Distance |
|------|------|----------|------|------|----------|
| 135A | 51S  | 9.90     | 135A | 52A  | 9.90     |
| 133A | 51S  | 12.00    | 133A | 52A  | 13.10    |
| 134A | 51S  | 8.30     | 134A | 52A  | 9.40     |
| 87M  | 132M | 20.20    | 87M  | 133A | 19.80    |
| 132M | 86V  | 16.60    | 132M | 88V  | 19.70    |
|      |      |          | 132M | 88V  | 19.70    |
| 170A | 129V | 23.30    | 170A | 130A | 22.60    |
| 134A | 165E | 21.50    | 134A | 166A | 23.80    |
| 135A | 165E | 20.50    | 135A | 166A | 23.10    |
| 198L | 172L | 6.00     | 198L | 173C | 9.60     |
| 245A | 173C | 8.80     | 245A | 174L | 8.50     |
| 197A | 245A | 15.50    | 197A | 246A | 13.00    |
| 241L | 201A | 14.90    | 241L | 202A | 17.30    |

Table 13: The proposed contact prediction for 2W1PA from our method. Res1 is the MAIN residue and Res2 and Res3 are the SECONDARY residues in the TRIPLET contact.

| Res1 | Res2 | Distance | Res1 | Res3 | Distance |
|------|------|----------|------|------|----------|
| 49A  | 25V  | 8.90     | 49A  | 26A  | 9.70     |
| 57L  | 18L  | 10.50    | 57L  | 19L  | 8.40     |
| 25V  | 105L | 9.70     | 25V  | 106V | 6.90     |
| 96C  | 59Y  | 20.10    | 96C  | 60C  | 19.00    |
| 145V | 100I | 23.00    | 145V | 101C | 24.80    |
| 143V | 100I | 25.30    | 143V | 101C | 27.30    |
| 140G | 174A | 8.90     | 140G | 175V | 8.50     |
| 145V | 223A | 8.80     | 145V | 224V | 9.10     |
| 143V | 223A | 11.70    | 143V | 224V | 10.30    |
| 172G | 223A | 19.90    | 172G | 224V | 20.20    |
| 221G | 174A | 13.90    | 221G | 175V | 13.80    |

Table 14: The proposed contact prediction for 3CN5A from our method. Res1 is the MAIN residue and Res2 and Res3 are the SECONDARY residues in the TRIPLET contact.

| Res1 | Res2 | Distance | Res1 | Res3 | Distance |
|------|------|----------|------|------|----------|
| 10A  | 59A  | 6.20     | 10A  | 60D  | 4.70     |
| 15V  | 54C  | 9.60     | 15V  | 55V  | 13.40    |
| 95V  | 56V  | 21.00    | 95V  | 57C  | 18.40    |
| 49L  | 102L | 20.60    | 49L  | 103L | 18.80    |
| 107S | 40K  | 24.80    | 107S | 41L  | 26.50    |
| 98L  | 138C | 25.20    | 98L  | 139L | 22.70    |
| 89V  | 147V | 15.90    | 89V  | 148C | 15.70    |
| 95V  | 137V | 23.00    | 95V  | 138C | 25.50    |
| 173M | 136A | 17.10    | 173M | 137V | 17.60    |
|      |      |          | 125A | 185N | 8.10     |
| 184A | 125A | 10.90    | 184A | 126D | 14.30    |
| 168V | 241I | 19.70    | 168V | 242L | 22.10    |
| 233G | 175V | 15.50    | 233G | 176A | 18.20    |
| 230V | 175V | 14.10    | 230V | 176A | 16.90    |
| 9L   | 240G | 25.40    | 9L   | 241I | 35.10    |

Table 15: The proposed contact prediction for 3KCUA from our method. Res1 is the MAIN residue and Res2 and Res3 are the SECONDARY residues in the TRIPLET contact.

| Res1 | Res2 | Distance | Res1 | Res3 | Distance |
|------|------|----------|------|------|----------|
| 57G  | 109G | 1.50     | 57G  | 110A | 3.50     |
| 102L | 50L  | 7.50     | 102L | 51G  | 6.80     |
| 63L  | 117A | 11.20    | 63L  | 118S | 12.90    |
| 195G | 137L | 6.00     | 195G | 138A | 9.00     |
| 203L | 130A | 3.00     | 203L | 131L | 1.40     |
| 187M | 145G | 9.70     | 187M | 146V | 12.50    |
| 216G | 265A | 8.00     | 216G | 266L | 7.30     |
| 272G | 224A | 9.30     | 272G | 225L | 12.10    |
| 221L | 271L | 7.20     | 221L | 272G | 6.60     |
| 42G  | 290A | 10.10    | 42G  | 291L | 19.30    |
| 25G  | 305A | 21.00    | 25G  | 306G | 99.90    |
| 296I | 36G  | 13.50    | 296I | 37L  | 15.60    |

Table 16: The proposed contact prediction for 3K3FA from our method. Res1 is the MAIN residue and Res2 and Res3 are the SECONDARY residues in the TRIPLET contact.

| Res1 | Res2 | Distance | Res1 | Res2 | Distance |
|------|------|----------|------|------|----------|
| 375I | 413G | 5.9      | 350F | 377F | 14.6     |
| 348L | 376V | 8.5      | 280I | 293A | 17.4     |
| 375I | 416I | 6.8      | 280I | 365L | 22.2     |
| 337E | 380N | 7.4      | 345G | 373V | 4.3      |
| 353V | 369G | 5.7      | 337E | 407T | 20.7     |
| 357Y | 365L | 6.6      | 352L | 368V | 8.1      |
| 349S | 369G | 5.4      | 354G | 368V | 10.6     |
| 356V | 365L | 6.2      | 337E | 410D | 20.2     |
| 367V | 420V | 7        | 267L | 407T | 10.2     |
| 370V | 420V | 8.4      | 267L | 369G | 31.3     |
| 356V | 368V | 7.7      | 271I | 377F | 23.8     |
| 337E | 381L | 6.7      | 355K | 365L | 9.3      |
| 342L | 377F | 5.6      | 280I | 339G | 28.9     |
| 352L | 372L | 8.6      | 301L | 400V | 21.6     |
| 345G | 376V | 5.3      | 267L | 377F | 26.1     |
| 371S | 417Y | 5.3      | 356V | 366P | 9.6      |
| 310N | 405V | 6.2      | 275M | 377F | 23.1     |
| 309G | 405V | 6        | 271I | 369G | 27.9     |
| 341G | 377F | 4.6      | 353V | 377F | 16.5     |
| 349S | 373V | 6.6      | 280I | 364L | 20.2     |
| 371S | 420V | 7        | 371S | 412T | 11.4     |
| 367V | 421A | 6.1      | 370V | 412T | 14.9     |
| 356V | 364L | 7.9      | 374L | 412T | 10.4     |
| 306G | 409S | 5.1      | 302L | 410D | 5.7      |
| 346L | 377F | 9.6      | 337E | 372L | 16.3     |
| 353V | 368V | 7        | 280I | 290A | 16.7     |
| 349S | 372L | 5.9      | 268V | 412T | 19.1     |
| 305G | 409S | 5.8      | 302L | 413G | 5.2      |
| 358W | 365L | 10.4     | 349S | 377F | 11.5     |
| 280I | 400V | 23       | 350F | 372L | 9.6      |

Table 17: The proposed contact prediction for 2ZY9A from TMhit(L/2). The predictions of TMhit(L/5) are the first 24 contacts in this table (vertical counting first).

| Res1 | Res2 | Distance | Res1 | Res2 | Distance |
|------|------|----------|------|------|----------|
| 169T | 246A | 8.3      | 130A | 165E | 21.2     |
| 45T  | 246A | 21.5     | 202H | 246A | 17.5     |
| 169T | 242G | 4.9      | 125F | 197A | 23.5     |
| 172L | 241L | 12.2     | 131G | 246A | 23.5     |
| 165E | 246A | 12.9     | 47L  | 241L | 26.1     |
| 44G  | 93T  | 6.1      | 90V  | 126T | 15.2     |
| 84F  | 241L | 24.3     | 48F  | 169T | 16.8     |
| 127Q | 246A | 20.3     | 125F | 241L | 19       |
| 48F  | 242G | 20.8     | 48F  | 165E | 19.2     |
| 48F  | 246A | 22.7     | 200I | 241L | 18.3     |
| 48F  | 126T | 13.7     | 169T | 203L | 12.5     |
| 48F  | 130A | 9.7      | 166A | 244F | 9.2      |
| 168G | 241L | 10.3     | 170A | 244F | 7.7      |
| 170A | 197A | 9.8      | 48F  | 129V | 13.3     |
| 169T | 199L | 11.4     | 45T  | 173C | 16.1     |
| 128I | 166A | 19       | 176V | 241L | 15.7     |
| 195G | 246A | 16.6     | 47L  | 126T | 13.2     |
| 131G | 165E | 18.2     | 45T  | 165E | 19.4     |

Table 18: The proposed contact prediction for 2W1PA from TMhit(L/2). The predictions of TMhit(L/5) are the first 15 contacts in this table (vertical counting first).

| Res1 | Res2 | Distance | Res1 | Res2 | Distance |
|------|------|----------|------|------|----------|
| 141T | 225A | 8.4      | 98G  | 137E | 21.8     |
| 17T  | 225A | 22.5     | 53M  | 137E | 19.7     |
| 141T | 221G | 5        | 142F | 223A | 8.2      |
| 144L | 220I | 12.3     | 96C  | 223A | 19.7     |
| 98G  | 225A | 25.6     | 16A  | 98G  | 7.5      |
| 137E | 225A | 13       | 20F  | 221G | 21.3     |
| 20F  | 102G | 7.3      | 19L  | 220I | 26.1     |
| 172G | 225A | 17       | 21L  | 141T | 17.8     |
| 147T | 174A | 7        | 140G | 220I | 10.7     |
| 52G  | 220I | 24.7     | 168P | 225A | 17.9     |
| 17T  | 137E | 19.6     | 138I | 223A | 9.7      |
| 105L | 220I | 30.5     | 20F  | 141T | 17.2     |
| 99A  | 225A | 24.2     | 16A  | 178V | 20.4     |
| 99A  | 137E | 18.8     | 144L | 174A | 5.6      |
| 20F  | 225A | 23.4     | 144L | 167A | 12.6     |
| 98G  | 221G | 22.9     | 20F  | 146Y | 21       |
| 21L  | 60C  | 15.8     | 20F  | 137E | 19.2     |
| 17T  | 107K | 16       |      |      |          |

Table 19: The proposed contact prediction for 3CN5A from TMhit(L/2). The predictions of TMhit(L/5) are the first 14 contacts in this table (vertical counting first).



| Res1 | Res2 | Distance | Res1 | Res2 | Distance |
|------|------|----------|------|------|----------|
| 46C  | 237G | 23.3     | 9L   | 60D  | 5.4      |
| 170P | 236I | 18.2     | 139L | 180E | 5.2      |
| 92G  | 236I | 20.7     | 46C  | 138C | 23.9     |
| 55V  | 238G | 17.1     | 92G  | 166I | 26.5     |
| 9L   | 180E | 22.1     | 9L   | 56V  | 12.5     |
| 46C  | 184A | 13.7     | 91F  | 142L | 22       |
| 170P | 240L | 17.2     | 104M | 220M | 21.8     |
| 100F | 176A | 22.3     | 46C  | 147V | 14.7     |
| 170P | 232I | 20.8     | 53L  | 236I | 24.5     |
| 48S  | 97A  | 16.4     | 107S | 134I | 36.3     |
| 55V  | 97A  | 17.4     | 40K  | 136A | 19.1     |
| 31T  | 184A | 21       | 41L  | 141I | 19.9     |
| 41L  | 231T | 23.8     | 52I  | 141I | 21       |
| 128K | 184A | 11.2     | 48S  | 238G | 18.6     |
| 46C  | 242V | 27.8     | 85N  | 175V | 25.8     |
| 54C  | 97A  | 13.7     | 92G  | 237G | 21.1     |
| 18S  | 48S  | 11.3     | 169L | 232I | 24.3     |
| 92G  | 232I | 17.9     | 59A  | 147V | 14.2     |
| 40K  | 140G | 18       | 31T  | 126D | 17.6     |
| 54C  | 238G | 17.3     | 92G  | 147V | 18.4     |
| 40K  | 93N  | 24.6     | 16F  | 43G  | 15.6     |
| 46C  | 232I | 26.1     | 11I  | 244L | 29.6     |
| 53L  | 232I | 24.7     | 60D  | 184A | 13.4     |
| 88N  | 232I | 16.4     | 40K  | 233G | 22.1     |
| 40K  | 221N | 24.8     | 101V | 168V | 24.4     |
| 16F  | 237G | 21.5     | 103L | 220M | 22.5     |
| 46C  | 236I | 26.2     | 48S  | 243G | 25.8     |
| 31T  | 134I | 29.6     | 48S  | 235I | 20.3     |
| 44G  | 175V | 4.9      | 46C  | 229P | 25.9     |
| 40K  | 234N | 21.2     | 52I  | 231T | 21.7     |
| 91F  | 232I | 15.2     | 91F  | 146M | 21.8     |
| 14G  | 238G | 18.4     | 14G  | 242V | 23.1     |
| 49L  | 146M | 14.7     | 53L  | 220M | 30.4     |
| 92G  | 224T | 20.1     | 101V | 232I | 23.5     |
| 15V  | 97A  | 5.4      | 128K | 229P | 11.5     |
| 31T  | 131H | 23.4     | 167M | 244L | 20.3     |
| 40K  | 181H | 15.7     | 48S  | 90Y  | 19.7     |

Table 20: The proposed contact prediction for 3KCUA from TMhit(L/2). The predictions of TMhit(L/5) are the first 30 contacts in this table (vertical counting first).

| Res1 | Res2 | Distance | Res1 | Res2 | Distance |
|------|------|----------|------|------|----------|
| 305Y | 761L | 24.8     | 838A | 969F | 80.6     |
| 305Y | 757N | 34.3     | 839G | 935F | 21.9     |
| 75Q  | 114V | 48.9     | 763P | 935F | 66.5     |
| 114V | 836S | 16.1     | 280F | 766I | 43.1     |
| 280F | 935F | 33.3     | 280F | 939I | 36       |
| 842D | 935F | 82.2     | 273A | 835Q | 16.1     |
| 763P | 838A | 32.3     | 273A | 935F | 37.9     |
| 763P | 835Q | 25.2     | 766I | 837F | 59.5     |
| 766I | 935F | 33.5     | 79W  | 836S | 41.2     |
| 280F | 835Q | 95.1     | 273A | 758I | 32.7     |
| 114V | 312A | 76.1     | 282I | 834I | 7.4      |
| 115V | 836S | 19.1     | 899S | 940G | 25.9     |
| 838A | 935F | 84.8     | 115V | 279T | 22.6     |
| 114V | 761L | 13.5     | 766I | 939I | 33       |
| 279T | 837F | 3.8      | 842D | 899S | 46.8     |
| 274I | 836S | 99.3     | 766I | 834I | 55.5     |
| 839G | 896F | 17.4     | 114V | 271G | 15.6     |
| 278A | 837F | 85.8     | 271G | 974F | 21.9     |
| 280F | 762T | 38.8     | 766I | 835Q | 54.4     |
| 759P | 835Q | 37.8     | 759P | 838A | 41.2     |
| 112A | 276F | 25.6     | 109A | 279T | 53.2     |
| 788T | 835Q | 49.7     | 274I | 941C | 17.8     |
| 762T | 935F | 52.7     | 278A | 836S | 84.3     |
| 118G | 836S | 39.3     | 115V | 275L | 29.9     |
| 766I | 943L | 38.7     | 114V | 967M | 27.5     |
| 788T | 935F | 68.2     | 271G | 836S | 101.1    |
| 112A | 935F | 58.2     | 75Q  | 785E | 29.8     |
| 766I | 838A | 59.7     | 842D | 969F | 56.5     |
| 273A | 762T | 29.4     | 75Q  | 977D | 44.7     |
| 112A | 279T | 33.3     | 763P | 900I | 56       |
| 75Q  | 305Y | 33.4     |      |      |          |

Table 21: The proposed contact prediction for 3IXZA from TMhit(L/2). The predictions of TMhit(L/5) are the first 25 contacts in this table (vertical counting first).

| Res1 | Res2 | Distance | Res1 | Res2 | Distance |
|------|------|----------|------|------|----------|
| 200V | 215I | 14.4     | 50L  | 254F | 30.1     |
| 28M  | 194T | 14.1     | 67L  | 263L | 42.4     |
| 38L  | 275A | 29.5     | 200V | 219V | 19.5     |
| 32N  | 51G  | 18.3     | 27V  | 194T | 14.5     |
| 44F  | 195G | 12.2     | 42G  | 215I | 20       |
| 38L  | 271L | 29.4     | 111F | 275A | 25.7     |
| 64T  | 212F | 32.2     | 202I | 210A | 5.3      |
| 27V  | 246C | 12.2     | 42G  | 194T | 4.5      |
| 53C  | 275A | 28.4     | 53C  | 254F | 29.8     |
| 38L  | 60A  | 20       | 92P  | 246C | 25.1     |
| 38L  | 200V | 8.2      | 27V  | 265A | 18.5     |
| 67L  | 194T | 32.7     | 104Y | 197I | 28.3     |
| 42G  | 87A  | 17.1     | 271L | 283L | 18.2     |
| 200V | 274I | 27.3     | 53C  | 197I | 18.8     |
| 41A  | 215I | 23       | 42G  | 51G  | 8.6      |
| 32N  | 80F  | 14.1     | 79L  | 194T | 22.8     |
| 197I | 275A | 26.9     | 130A | 194T | 25.9     |
| 44F  | 51G  | 4.8      | 194T | 254F | 26.1     |
| 216G | 283L | 23.9     | 41A  | 197I | 8        |
| 27V  | 87A  | 11       | 88G  | 275A | 24.4     |
| 35T  | 254F | 19.2     | 200V | 244V | 14.3     |
| 27V  | 84G  | 9.3      | 111F | 219V | 32.7     |
| 32N  | 81G  | 12.4     | 44F  | 210A | 20.7     |
| 58T  | 195G | 19.9     | 113T | 246C | 22.3     |
| 92P  | 194T | 17.7     | 104Y | 271L | 33.1     |
| 32N  | 210A | 13.4     | 203L | 210A | 5        |
| 35T  | 190D | 19.4     | 219V | 283L | 23.8     |
| 60A  | 219V | 34.4     | 268C | 283L | 21.8     |
| 200V | 218L | 16.7     | 42G  | 271L | 28       |
| 67L  | 210A | 34       | 67L  | 261T | 39.2     |
| 27V  | 195G | 13.7     | 141L | 195G | 28.2     |
| 38L  | 219V | 24.7     | 53C  | 279F | 26.2     |
| 60A  | 215I | 32.7     | 212F | 283L | 28.5     |
| 202I | 246C | 14.7     | 41A  | 219V | 26.4     |
| 247G | 275A | 14.5     | 32N  | 236L | 27.7     |
| 38L  | 223T | 29.3     | 53C  | 204V | 24.2     |
| 67L  | 259I | 44       | 113T | 195G | 26.7     |

Table 22: The proposed contact prediction for 3K3FA from TMhit(L/2). The predictions of TMhit(L/5) are the first 44 contacts in this table (vertical counting first).

| Res1 | Res2 | Distance | Res1 | Res2 | Distance |
|------|------|----------|------|------|----------|
| 146V | 194T | 29.7     | 104Y | 275A | 29       |
| 35T  | 212F | 15.8     | 39F  | 201A | 6.5      |
| 42G  | 275A | 27.4     | 41A  | 271L | 31.1     |
| 32N  | 237G | 25.1     | 139T | 275A | 19.1     |
| 32N  | 213A | 16       | 190D | 212F | 20       |
| 38L  | 215I | 20.6     | 38L  | 87A  | 18.6     |
| 35T  | 283L | 32.9     | 61S  | 194T | 23.7     |
| 31N  | 212F | 16.3     | 104Y | 223T | 36.1     |
| 67L  | 195G | 33.7     | 143M | 195G | 25.9     |
| 88G  | 271L | 27.5     | 194T | 283L | 28       |
| 43I  | 51G  | 5.4      | 212F | 275A | 18.9     |
| 38L  | 201A | 5.5      | 32N  | 127G | 22.3     |
| 91L  | 212F | 27.9     | 29F  | 194T | 17.6     |
| 141L | 200V | 33.4     | 27V  | 266L | 20.5     |
| 42G  | 246C | 21       | 67L  | 101M | 22.5     |
| 32N  | 284S | 36.6     | 58T  | 296I | 19.9     |
| 60A  | 212F | 30       | 53C  | 283L | 25.4     |

Table 23: Continue of Table 22. The proposed contact prediction for 3K3FA from TMhit(L/2). The predictions of TMhit(L/5) are the first 44 contacts in this table (vertical counting first).

## References

- [1] McAllister SR, Floudas CA, alpha-helical topology prediction and generation of distance restraints in membrane proteins. *Biophys J* 2008;95:5281-5295.
